# Epigenetic age predicts depressive symptoms during the COVID-19 pandemic in the Canadian Longitudinal Study on Aging: importance of biological sex

Cindy K. Barha<sup>1,2,3,4</sup>, Teresa Liu-Ambrose<sup>3,4</sup>, Amy M. Inkster<sup>5,6</sup>, Ryan S. Falck<sup>3,4,7</sup>, Joel S. Burma<sup>1,2</sup>, Susan Kirkland<sup>8</sup>, Lauren E. Griffith<sup>9,10</sup>, Mary Thompson<sup>11</sup>, Nicole E. Basta<sup>12</sup>, Jacqueline M. McMillan<sup>13</sup>, Cynthia Balion<sup>14</sup>, Christina Wolfson<sup>12</sup>, Parminder Raina<sup>9,10</sup>,  
on behalf of the Canadian Longitudinal Study on Aging (CLSA) Team

<sup>1</sup>Barha Brain Health Laboratory, Faculty of Kinesiology, University of Calgary, Alberta, Canada

<sup>2</sup>Hotchkiss Brain Institute, University of Calgary, Calgary, Alberta, Canada

<sup>3</sup>Aging, Mobility, and Cognitive Neuroscience Laboratory, Department of Physical Therapy, University of British Columbia, Vancouver, BC, Canada

<sup>4</sup>Djavad Mowafaghian Centre for Brain Health, Faculty of Medicine, University of British Columbia, Vancouver, BC, Canada

<sup>5</sup>Department of Medical Genetics, University of British Columbia, Vancouver, BC, Canada

<sup>6</sup>BC Children's Hospital Research Institute, Vancouver, BC, Canada

<sup>7</sup>School of Biomedical Engineering, University of British Columbia, Vancouver, BC, Canada

<sup>8</sup>Department of Community Health and Epidemiology, Dalhousie University, Halifax, Nova Scotia, Canada

<sup>9</sup>Department of Health Research Methods, Evidence, and Impact, McMaster University, Hamilton, ON, Canada

<sup>10</sup>McMaster Institute for Research on Aging, McMaster University, Hamilton, ON, Canada

<sup>11</sup>Department of Statistics and Actuarial Science, University of Waterloo, Waterloo, ON, Canada

<sup>12</sup>Department of Epidemiology, Biostatistics and Occupational Health, McGill University, Montreal, Quebec, Canada

<sup>13</sup>Division of Geriatric Medicine, Cumming School of Medicine, University of Calgary, Calgary, Alberta, Canada

<sup>14</sup>Department of Pathology and Molecular Medicine, McMaster University, Hamilton, ON, Canada

**Correspondence to:** Teresa Liu-Ambrose; email: [teresa.ambrose@ubc.ca](mailto:teresa.ambrose@ubc.ca)

**Keywords:** epigenetic clocks, COVID-19, depressive symptoms, sex differences, aging, CLSA

**Received:** May 12, 2025

**Accepted:** October 30, 2025

**Published:** November 18, 2025

**Copyright:** © 2025 Barha et al. This is an open access article distributed under the terms of the [Creative Commons Attribution License](https://creativecommons.org/licenses/by/4.0/) (CC BY 4.0), which permits unrestricted use, distribution, and reproduction in any medium, provided the original author and source are credited.

## ABSTRACT

Epigenetic age is a biological metric of overall health and may predict mental health responses to unprecedented stressors. We sought to determine whether epigenetic age acceleration can predict older adults' trajectory of depressive symptoms before and during the COVID-19 pandemic, and whether sex differences exist.

Data from baseline (2012-2015), first follow-up (2015-2018), and COVID-19 Baseline survey (April-May 2020) and COVID-19 Exit survey (September-December 2020) of the Canadian Longitudinal Study on Aging were used. Epigenetic age was measured at the study baseline, and depressive symptoms were assessed at each of the four time points using the 10-item Center for Epidemiological Studies Depression Scale (CESD-10). Sex-stratified mixed linear models examined the effect of epigenetic age (measured by DNAmAge and Hannum Age) on changes in CESD-10.

**The mean participant chronological age at study entry was 63±10 years (46% female). Unexpectedly, younger epigenetic age predicted increases in depressive symptoms from first follow-up to COVID-19 Baseline survey ( $p$ 's < 0.05) in females only. Higher epigenetic age was not related to changes in CES-10 score during that time period ( $p$ 's > 0.05).**

**These findings suggest epigenetic age is a biological factor that can identify females at risk for greater negative effects of major life stressors on mental health.**

## INTRODUCTION

The Coronavirus disease 2019 (COVID-19) pandemic has had a significant impact on the mental health of the global population [1]. Several studies have shown that increased exposure to stressors and experiences related to the pandemic (e.g., job loss, physical distancing and isolation, and caregiver burden) [2, 3] has led to increased prevalence of depressive symptoms and psychological distress in specific groups of the population [3–8]. While COVID-19-related social restrictions have eased back to pre-pandemic levels, it is nevertheless imperative to understand factors that can help identify those most at risk for the negative mental health impacts of pandemic restrictions. This knowledge will not only help develop effective interventions for protecting mental health during subsequent global pandemics but will also aid more general public mental health initiatives by helping identify subgroups of individuals who may be more affected by major stress exposures.

Sex differences exist in depression, with females experiencing a two-fold higher likelihood of being diagnosed and presenting with more severe symptoms than males [9, 10]. This sex difference extends to the effects of the COVID-19 pandemic on depressive symptoms, with females across the globe showing greater increases in depressive symptoms in several large cohort studies [4, 11–14]. While the etiology of this sex difference is not well understood, psychosocial, environmental, hormonal, and anatomical factors likely play roles [15]. Epigenetics, or covalent modifications to DNA without alterations to the underlying sequence, has emerged as a potential biological mechanism related to vulnerability or resilience to depression [16, 17], which likely contributes to differences in prevalence and incidence of depression between females and males [18].

Subtle variations in DNA methylation across the epigenome have been linked to numerous diseases and disorders [19]. Whereas chronological age represents the time elapsed since birth and increases uniformly across individuals, epigenetic age is a biomarker of biological aging derived from DNA methylation levels

at a set of predefined genetic loci, influenced by genetic, environmental, and lifestyle factors [19]. Although first-generation epigenetic clocks were designed to predict chronological age, divergence between the two measures—manifesting as epigenetic age acceleration or deceleration—is a common phenomenon. Accelerated epigenetic age, defined as positive deviations from chronological age, is generally associated with adverse health outcomes, including cardiovascular and neurodegenerative diseases, as well as increased mortality [20]. In contrast, epigenetic age deceleration is a more complex phenomenon. While often linked to slower biological aging and better health, it has also been observed in individuals exposed to early-life neglect and war, supporting its role as a multifaceted and context-dependent biomarker [21–23]. Importantly, epigenetic age can be considered a surrogate measure of health, and some metrics have been found to correlate with the overall burden of disease [24].

Additionally, one's physical and mental health history is strongly reflected in epigenetic age and epigenetic age acceleration [25]. For example, exposure to chronic stress and major depressive disorder in early and middle age are both associated with accelerated epigenetic aging in later life [26–28], and cumulative lifetime stress is more strongly associated with accelerated epigenetic age than current stress in a cohort of African American individuals [29]. While specific DNA methylation signatures have been shown to identify cases of major depressive disorder accurately and also predict which individuals will later develop depression [30], currently, it is unknown whether epigenetic age acceleration, which is derived from DNA methylation signatures, is itself predictive of future changes in depressive symptoms or in the ability to respond to stress.

Although it is well-appreciated that the COVID-19 pandemic was associated with high levels of individual stress exposure, it remains unknown whether an individual's epigenetic age is predictive of their mental health response to COVID-19-related stressors and experiences. Thus, we build upon a previous report that used data from the Canadian Longitudinal Study of

Aging (CLSA) platform and found that middle- and older-aged adults were twice as likely to develop depressive symptoms during the COVID-19 pandemic compared with pre-pandemic rates [4]. Older adults were disproportionately affected by COVID-19 and impacted by the public health measures imposed during the early stages of the pandemic, stemming from a combination of factors, including increased physical health risks to SARS-CoV-2 infection, social isolation due to stricter adherence to distancing guidelines, and heightened emotional stress [31–33]. Thus, we aimed to determine whether epigenetic age at a given time point could predict subsequent mental health status or change in mental health status following major stressors. Specifically, we sought to determine whether epigenetic age acceleration could predict the trajectory of depressive symptoms among middle-aged and older adults during the early part of the COVID-19 pandemic. These observations, along with the hypothesis that epigenetic age may predict subsequent mental health response to a major stressor, led us to ask whether epigenetic age acceleration can predict an individual's trajectory of depressive symptoms during the COVID-19 pandemic. Given known sex differences in (i) epigenetic aging acceleration, with males having higher epigenetic age acceleration than women [34, 35], (ii) depression prevalence (higher in females) [36], and (iii) physiological response to stress in older age, with females showing greater cortisol release [37], we also conducted exploratory analyses to examine potential sex differences in the relationship between epigenetic age and the trajectory of depressive symptoms.

## RESULTS

### Participant characteristics

Participant characteristics at baseline are presented in Table 1. The demographic proportions of the final sample included in the current analyses were within 2% of those in the complete Comprehensive Cohort, and all participants with epigenetic data who also completed the COVID-19 Survey entry/exit portions (Table 1). Exceptions included sex, which was within 5% between samples, and PASE total scores, which were ~35 points higher for the final sample in the current analyses and for all participants with epigenetics data who completed the COVID-19 Survey, compared to the total Comprehensive sample (Table 1). For the final sample in the current analyses, the mean chronological age was  $63 \pm 10$  years, with a female representation of 46%. More than 80% of participants had a university degree or higher, and participants reported living with an average of 7 chronic conditions (range: 2–16). The mean baseline CESD-10 score was  $4.4 \pm 5.2$ , DNAmAge was  $57.5 \pm 8.7$  and Hannum Age was  $63.0 \pm 12.1$ . Chronological

age was strongly correlated with both DNAmAge ( $r=0.86$ ) and Hannum Age ( $r=0.85$ ). DNAmAge and Hannum age were correlated ( $r=0.87$ ).

### Association of epigenetic age with later changes in depressive symptoms during the COVID-19 pandemic

The present analyses include CESD-10 data collected from participants at 1) CLSA baseline (2012–2015), 2) CLSA first follow-up (2015–2018), 3) COVID-19 Baseline survey (April–May 2020), and 4) COVID-19 Exit survey (Sept–Dec 2020). Epigenetic age was measured in samples collected at CLSA baseline (2012–2015).

Estimated CESD-10 scores for low and high epigenetic age at each time point are described in Figure 1; estimated changes in CESD-10 scores at each time point are described in Figure 2. CESD-10 scores did not change from CLSA baseline to CLSA first follow-up, from CLSA first follow-up to COVID-19 Baseline survey, or from COVID-19 Baseline survey to COVID-19 Exit survey for individuals with high epigenetic age, as determined by DNAmAge or Hannum Age.

In contrast, CESD-10 scores increased from CLSA first follow-up to COVID-19 Baseline survey for individuals with low DNAmAge (estimated mean difference:  $-1.78$ ; 95% CI:  $[-2.47, -1.10]$ ,  $p<0.001$ ) and low Hannum Age (estimated mean difference:  $-1.84$ ; 95% CI:  $[-2.54, -1.14]$ ,  $p<0.001$ ). Individuals with low DNAmAge (estimated mean difference:  $1.10$ ; 95% CI:  $[0.09, 2.11]$ ,  $p<0.050$ ) and low Hannum Age (estimated mean difference:  $1.22$ ; 95% CI:  $[0.19, 2.25]$ ,  $p<0.030$ ) had significantly greater increases from CLSA first follow-up to COVID-19 Baseline survey than individuals with high DNAmAge and high Hannum Age, respectively. CESD-10 scores did not significantly change from CLSA baseline to CLSA first follow-up or from COVID-19 Baseline survey to COVID-19 Exit survey for individuals with low epigenetic age, as determined by DNAmAge and Hannum Age.

### Sex differences in the association of epigenetic age with changes in depressive symptoms: exploratory analyses

Estimated CESD-10 scores for low and high epigenetic age at each time point based on biological sex are described in Figures 3 (Female), 4 (Males); estimated changes in CESD-10 scores at each time point are described in Figures 5 (Females), 6 (Males). There were no changes in CESD-10 scores at each time point for males with high epigenetic age as determined by DNAmAge or Hannum Age. For males with low Hannum Age, CESD-10 scores increased from first

**Table 1. Participant characteristics at baseline (2012-2015).**

| Participant characteristic                       | All comprehensive cohort participants (N= 30,097) | COVID-19 survey participants with baseline epigenetic data (N= 879) | Final sample (N= 663) |
|--------------------------------------------------|---------------------------------------------------|---------------------------------------------------------------------|-----------------------|
| Mean Age (SD)                                    | 62.96 (10.25)                                     | 62.46 (9.66)                                                        | 62.79 (9.84)          |
| Males (n,%)                                      | 14777, 49.1%                                      | 430, 48.9%                                                          | 358, 54.0%            |
| Mean Body Mass Index (kg/m <sup>2</sup> ) (SD)   | 28.06 (5.44)                                      | 28.64 (5.77)                                                        | 28.49 (5.71)          |
| Education (n,%)                                  |                                                   |                                                                     |                       |
| <i>Less than high school</i>                     | 1643, 5.5%                                        | 30, 3.4%                                                            | 22, 3.3%              |
| <i>High school diploma</i>                       | 2839, 9.4%                                        | 77, 8.8%                                                            | 56, 8.4%              |
| <i>Some university</i>                           | 2238, 7.4%                                        | 74, 8.4%                                                            | 52, 7.8%              |
| <i>University degree or higher</i>               | 23327, 77.6%                                      | 698, 79.4%                                                          | 533, 80.4%            |
| Income Level (n,%)                               |                                                   |                                                                     |                       |
| <\$20,000 per year                               | 4373, 15.3%                                       | 113, 13.4%                                                          | 72, 11.3%             |
| \$20,000-\$50,000 per year                       | 10538, 36.9%                                      | 278, 33.0%                                                          | 199, 31.3%            |
| \$50,000-\$100,000 per year                      | 9696, 33.9%                                       | 304, 36.0%                                                          | 239, 37.6%            |
| \$100,000-\$150,000 per year                     | 2517, 8.8%                                        | 94, 11.1%                                                           | 80, 12.6%             |
| >\$150,000 per year                              | 1465, 5.1%                                        | 55, 6.5%                                                            | 46, 7.2%              |
| Mean Number of Chronic Conditions                | 7.36 (2.62)                                       | 7.31 (2.55)                                                         | 7.04 (2.47)           |
| Alcohol Intake                                   |                                                   |                                                                     |                       |
| <i>Non-Drinker</i>                               | 3427, 11.7%                                       | 89, 10.3%                                                           | 63, 9.7%              |
| <i>Occasional Drinker</i>                        | 3705, 12.6%                                       | 119, 13.8%                                                          | 85, 13.1%             |
| <i>Regular Drinker (at least once per month)</i> | 22239, 75.7%                                      | 665, 75.9%                                                          | 503, 77.3%            |
| Smoking Status                                   |                                                   |                                                                     |                       |
| <i>Daily Smoker</i>                              | 2088, 7.0%                                        | 58, 6.6%                                                            | 35, 5.3%              |
| <i>Occasional Smoker</i>                         | 488, 1.6%                                         | 12, 1.4%                                                            | 11, 1.7%              |
| <i>Former Smoker</i>                             | 17900, 59.8%                                      | 530, 60.6%                                                          | 397, 60.2%            |
| <i>Never Smoked</i>                              | 9445, 31.6%                                       | 275, 31.4%                                                          | 217, 32.9%            |
| Mean PASE Total Score <sup>1</sup> (SD)          | 129.26 (131.20)                                   | 165.26 (79.65)                                                      | 166.51 (81.84)        |
| Mean CESD-10 Score (SD)                          | 5.67 (7.64)                                       | 5.29 (5.63)                                                         | 4.44 (5.24)           |
| DNAmAge                                          | -                                                 | 57.18 (8.65)                                                        | 57.49 (8.72)          |
| Hannum Age                                       | -                                                 | 62.52 (11.98)                                                       | 63.00 (12.07)         |

<sup>1</sup>Physical Activity Scale for the Elderly.

follow-up to COVID-19 Baseline survey (estimated mean difference: -0.87; 95% CI: [-1.71, -0.03]). There were no significant differences in changes in CESD-10 scores between males with low and high epigenetic age categorizations.

CESD-10 scores did not change at any time point for females with high epigenetic age as determined by DNAmAge and Hannum Age. CESD-10 scores increased

from CLSA first follow-up to COVID-19 Baseline survey for females with low DNAmAge (estimated mean difference: -2.78 95% CI: [-3.89, -1.66]) and low Hannum Age (estimated mean difference: -2.67; 95% CI: [-3.82, -1.52]). Females with low DNAmAge had significantly greater increases in CESD-10 scores from CLSA first follow-up to COVID-19 Baseline survey than females with high DNAmAge (estimated mean difference: 1.75; 95% CI: [0.04, 3.45]).



DISCUSSION

The present study examined whether epigenetic age predicts an individual’s trajectory of change in mental health, specifically depressive symptoms, during the COVID-19 pandemic in people without a self-reported diagnosis of depression or anxiety at baseline, while considering biological sex as a modifying variable. For individuals with a younger epigenetic age, as estimated by DNAmAge and Hannum Age, there was a greater increase in depressive symptoms from the pre-pandemic period (i.e., 2015-2018) to the early stages of the COVID-19 pandemic (April–May 2020) compared to those with an older epigenetic age. Notably, the exploratory sex-stratified analysis demonstrated that the association between younger epigenetic age and increased depressive symptoms during the early stages of the COVID-19 pandemic was driven mainly by females

who showed this relationship with both epigenetic age metrics. While extremely interesting, it is worth noting that these sex-stratified analyses are exploratory and have not been corrected for multiple comparisons; therefore, they should be viewed with caution.

Previous work in this CLSA cohort identified three distinct trajectories of change in depressive symptoms from pre-pandemic to the early-stages and later-stages of the pandemic, with some participants showing consistently low depressive symptoms, some showing moderate increases in depressive symptoms, and some showing large increases in depressive symptoms [4]. Importantly, compared with males, females were 2.17 times more likely to be in the group showing large increases in depressive symptoms and 1.70 times more likely to be in the group showing moderate increases than they were to be in the group showing consistently

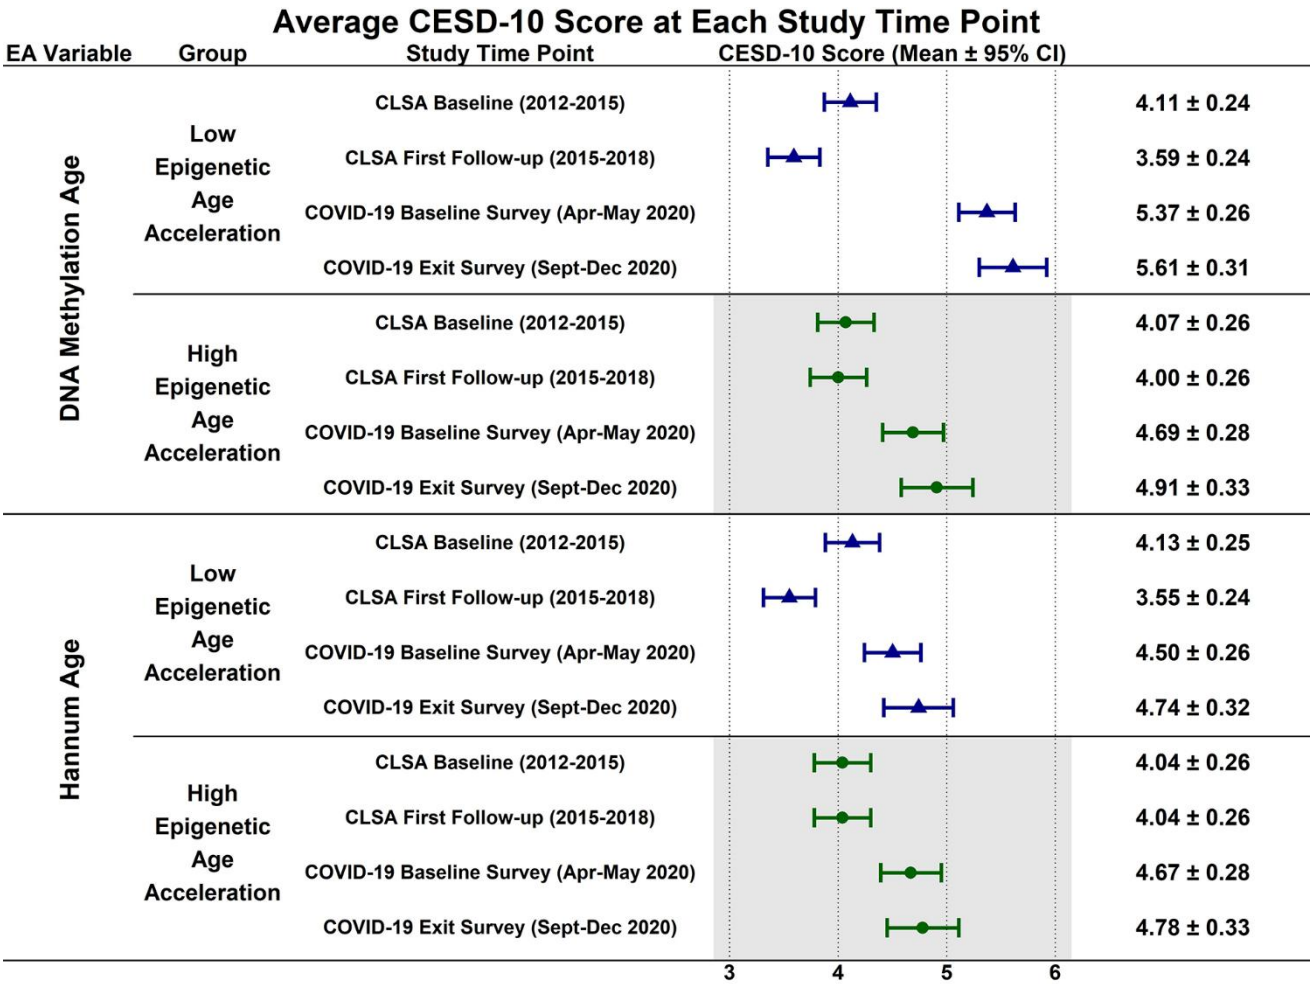

Figure 1. Estimated mean 10-item center for epidemiological studies depression scale (CESD-10) scores at each study timepoint for participants with low (-1 SD) and high (+1 SD) epigenetic age as determined by both epigenetic age markers.

low depressive symptoms. The present analyses extend these findings by showing that in females, younger epigenetic age, measured several years earlier, predicted increases in depressive symptoms in response to the early stages of the COVID-19 pandemic. This suggests that in females, one's cumulative history of physical and mental health as reflected in epigenetic age is a predictor of subsequent mental health, though the direction of the association was unexpected. Raina and colleagues found that males had lower odds of depressive symptoms during the pandemic [4], and here

we found that male epigenetic age did not predict these changes in depressive symptoms.

In our analyses, older epigenetic age, as determined by DNAmAge and Hannum Age, did not predict changes in depressive symptoms during the COVID-19 pandemic. These results are contrary to our hypothesis, as older epigenetic age has previously been associated with negative mental health outcomes. For instance, adverse experiences and events in childhood are linked to increased depressive symptoms in older age, with

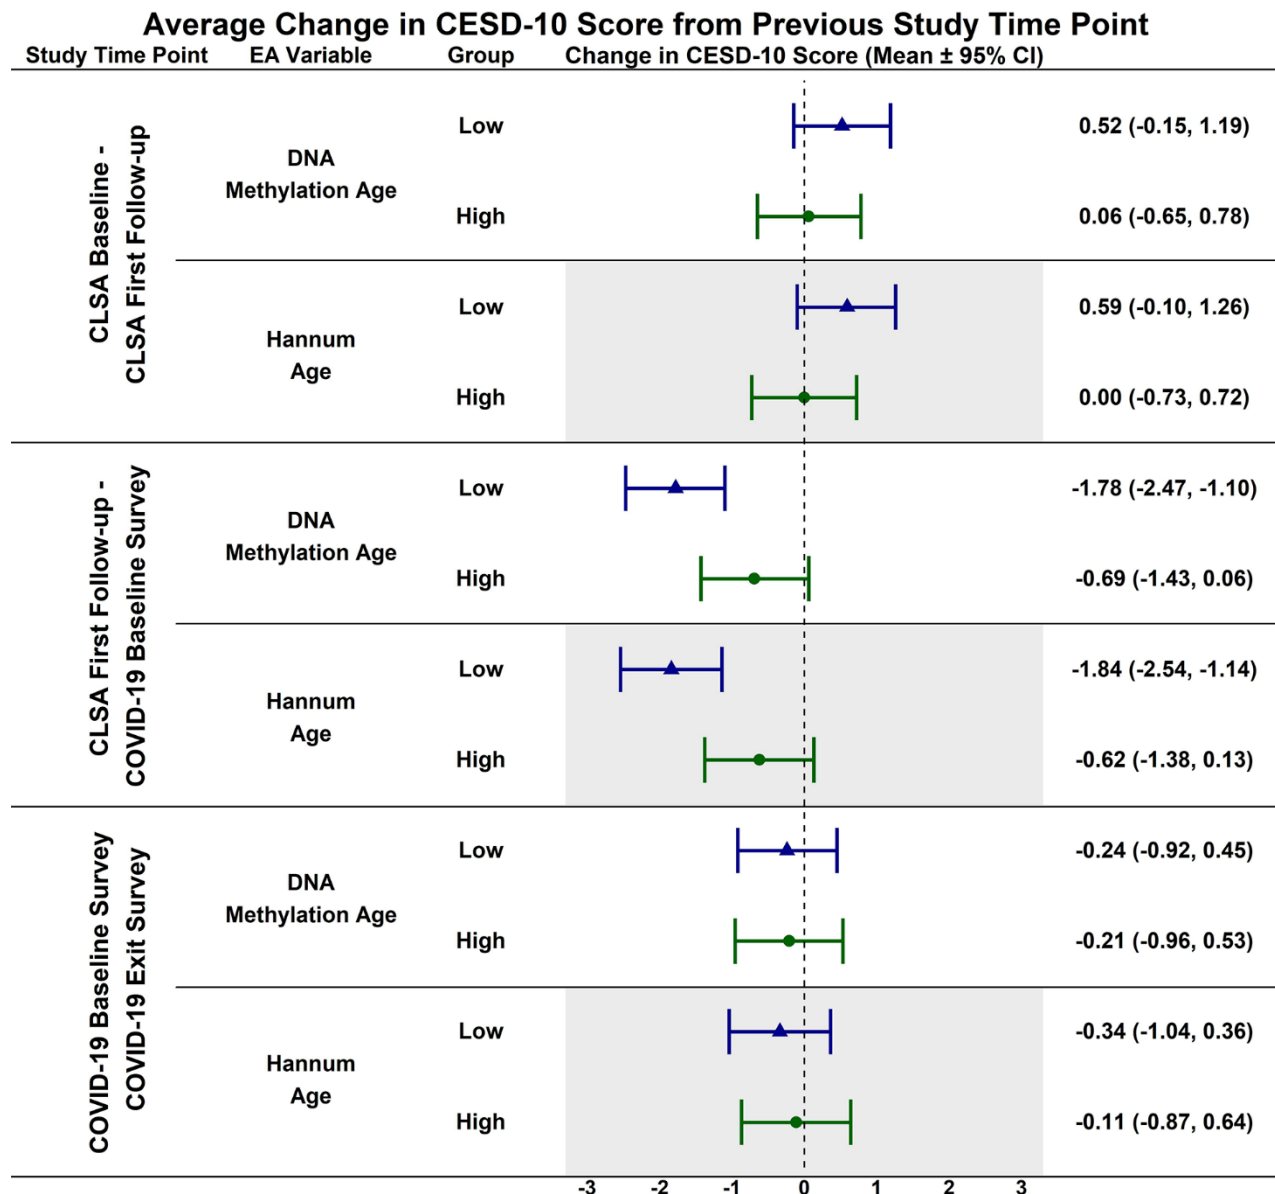

Figure 2. Estimated mean difference in 10-item center for epidemiological studies depression scale (CESD-10) score from CLSA baseline to CLSA first follow-up, from CLSA first follow-up to COVID-19 baseline survey, and from COVID-19 baseline survey to COVID-19 exist survey for low (-1 SD) vs. high (+1 SD) epigenetic age as determined by both epigenetic age markers.

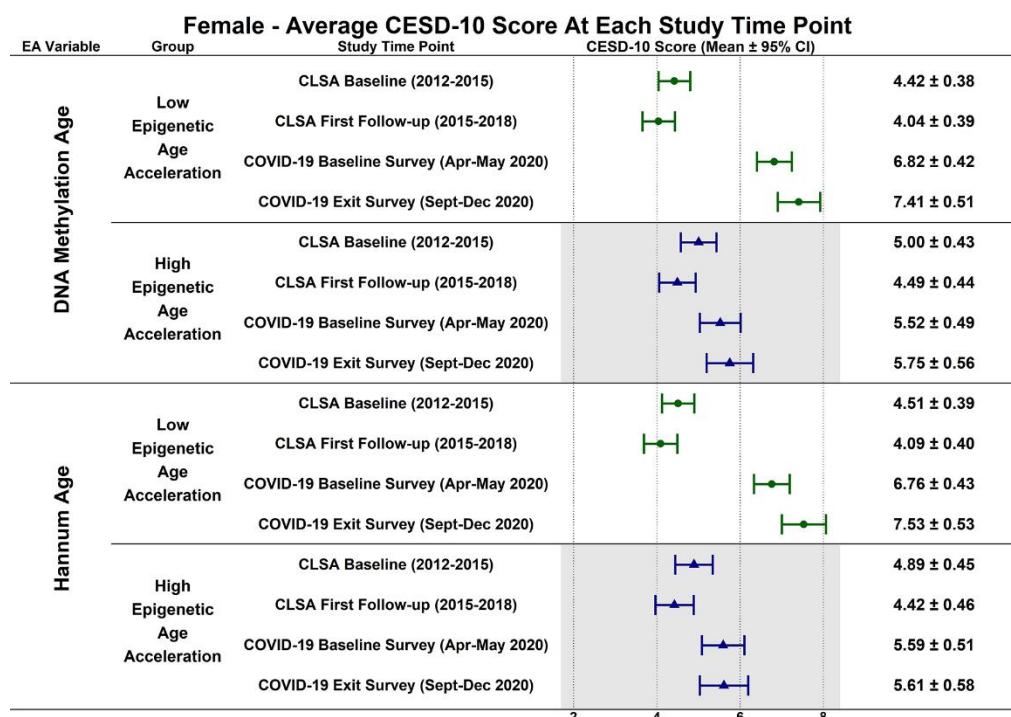

Figure 3. Differences in estimated mean 10-item center for epidemiological studies depression scale (CESD-10) scores in 305 females at each study timepoint for each epigenetic age marker based on low (-1 SD) and high (+1 SD) epigenetic age from exploratory, uncorrected analyses.

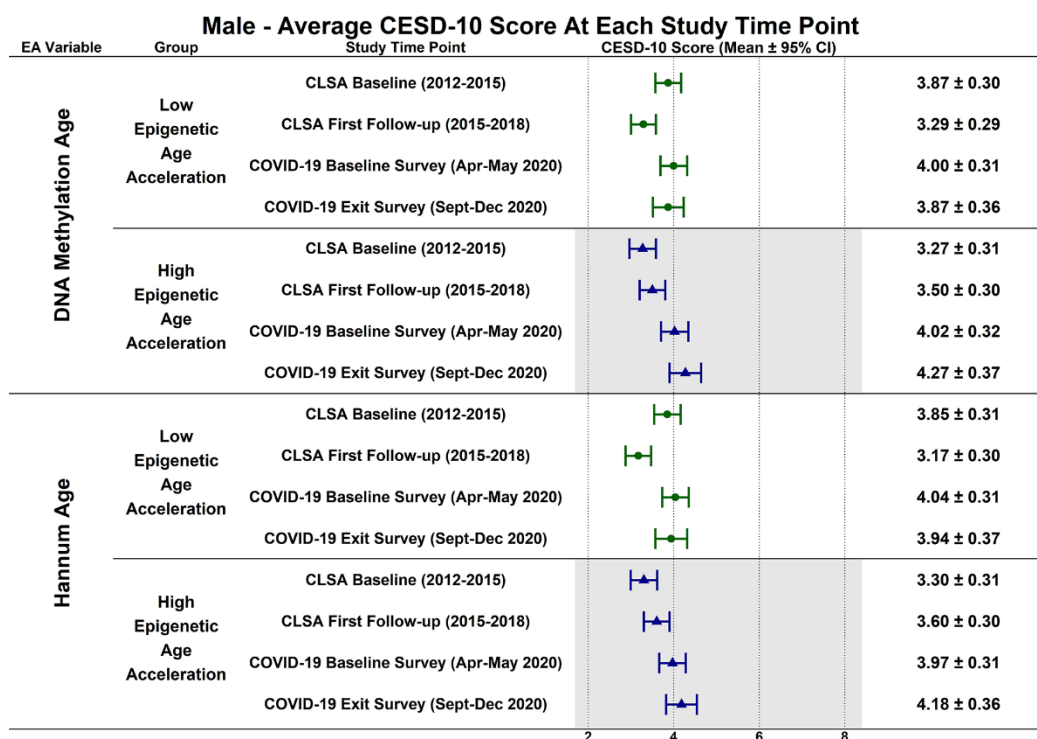

Figure 4. Differences in estimated mean 10-item center for epidemiological studies depression scale (CESD-10) scores in 358 males at each study timepoint for each epigenetic age marker based on low (-1 SD) and high (+1 SD) epigenetic age from exploratory, uncorrected analyses.

accelerated epigenetic aging mediating this association [38]. Although it is important to note that this link is not always seen, as in some contexts, early life neglect and war exposure are associated with epigenetic deceleration [21–23]. One potential explanation for our findings could be the unique stressors of the pandemic, which may have influenced individuals differently than early-life adversities. Additionally, factors like social support, adaptive coping mechanisms, or increased resiliency due to previous adverse life events may have buffered the relationship between epigenetic aging and depressive symptoms during this period.

In contrast to the findings between high epigenetic age and depressive symptoms, Figures 1–6 highlight that younger epigenetic age predicts increases in depressive symptoms during the early stages of the pandemic. However, this association was only seen in females. Additionally, only in females was decelerated epigenetic aging associated with increased depressive symptoms in response to the COVID-19 pandemic. There are several possible reasons for this finding. First,

factors that decelerate epigenetic aging may have amplified the negative effects of COVID-19 on mental health among females. For example, higher education and socioeconomic status are associated with younger epigenetic age as well as professional employment [39, 40]. Prior research shows that working outside the home prior to the pandemic is a risk factor for decreased mental health during the pandemic, especially for females [8]. This is likely due to the increased stress of balancing professional responsibilities with shifting work environments, while additionally contributing to childcare demands and family health concerns. The disruption of routines and adapting to additional pressures due to remote work may have contributed to heightened anxiety, stress, and depressive symptoms. As such, it is possible that the epigenetically younger females in our cohort were consequently more impacted by the pandemic from a mental health perspective.

We further propose that several social and lifestyle-related environmental exposures, previously associated with younger epigenetic age and decelerated biological

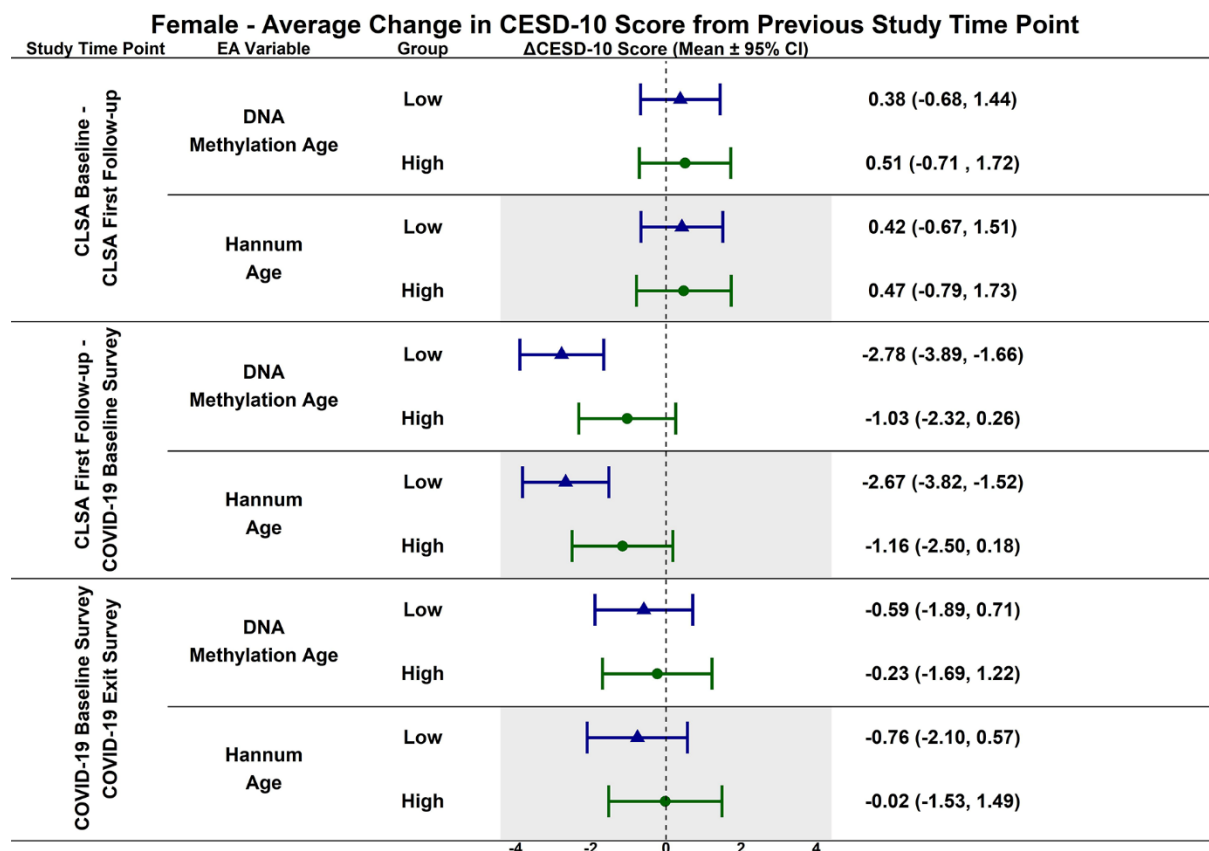

Figure 5. Differences in estimated mean difference in 10-item center for epidemiological studies depression scale (CESD-10) scores in females from CLSA baseline to CLSA first follow-up, from CLSA first follow-up to COVID-19 baseline survey, and from COVID-19 baseline survey to COVID-19 exist survey for low ( $-1$  SD) vs. high ( $+1$  SD) epigenetic age as determined by each epigenetic age marker from exploratory, uncorrected analyses.



aging [41], may have contributed to increased depressive symptomatology when significantly disrupted, as occurred during the COVID-19 pandemic. Social factors, such as frequent social contact, strong social support, and higher levels of socialization, are linked to a younger epigenetic age [42]. During the pandemic, individuals with more socially active lifestyles prior to lockdowns experienced greater increases in depressive symptoms due to enforced isolation [43]. Lifestyle behaviors associated with epigenetic aging show a similar pattern. Regular physical activity and exercise are consistently linked to slower epigenetic aging [44], while physical inactivity and sedentary behavior are associated with accelerated aging [45]. These behaviors also correlate with mental health: physical activity is protective against depression, particularly in females [46], whereas sedentary behavior is a known risk factor for depressive symptoms [47], with some evidence suggesting a stronger effect in

females [48]. Previous work using the CLSA Covid-19 survey data indicates that pandemic-related restrictions led to reduced physical activity and increased sedentary time among older adults [49], both of which were associated with poorer mental health outcomes [50]. Taken together, these findings support the hypothesis that the disruption of social and behavioral exposures known to promote epigenetic deceleration and healthy aging may have exacerbated depressive symptoms during the COVID-19 pandemic.

The associations between epigenetic age acceleration and exposure to various adverse health and environmental factors, including obesity, low socioeconomic status, frailty, and diabetes, are well established in the literature [22]. However, it is important to note that while these correlations are frequently observed, they are not universally consistent across all studies or populations. Factors such as genetic variability, lifestyle, or resilience

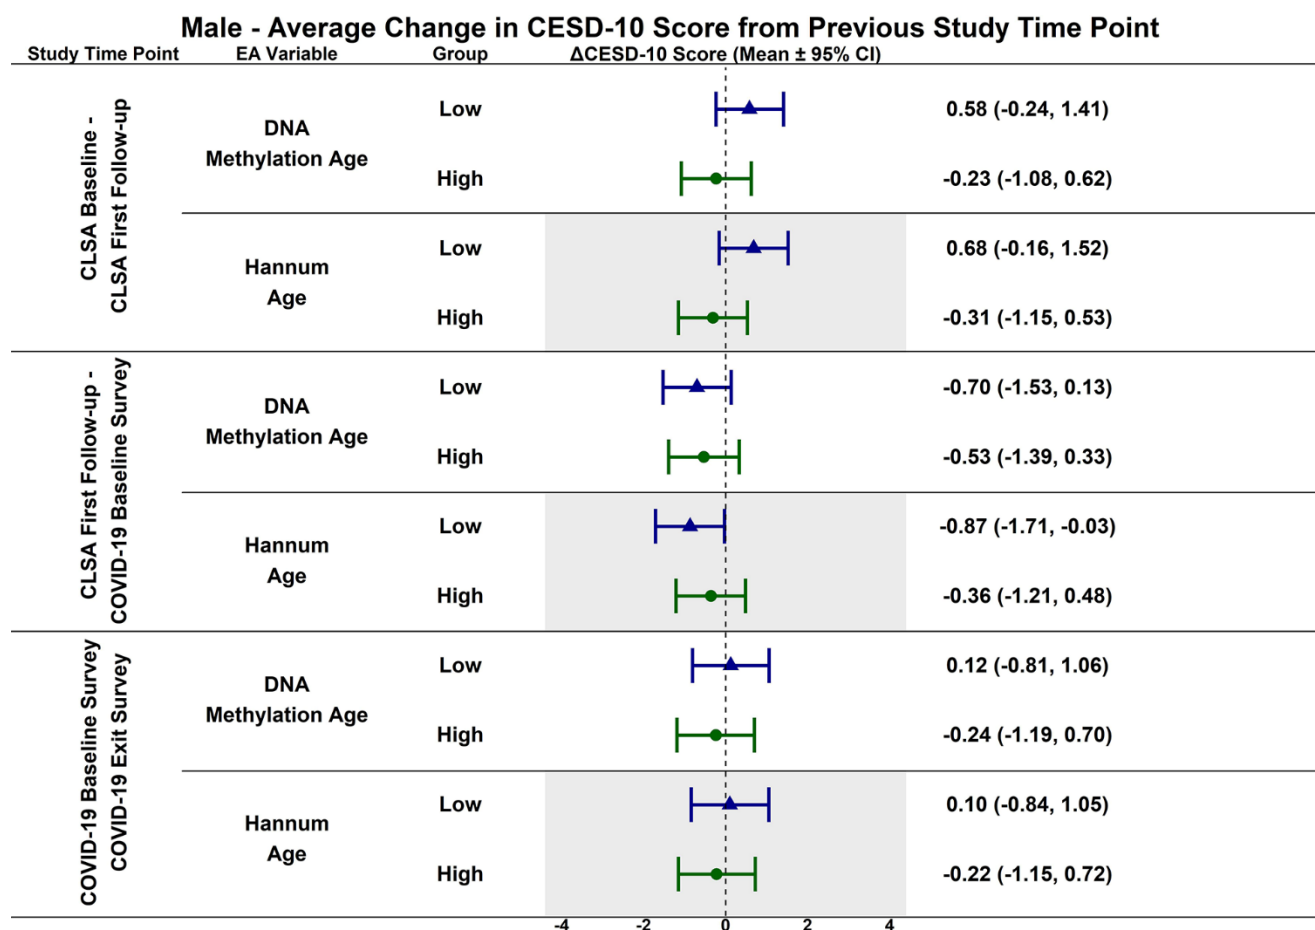

Figure 6. Differences in estimated mean difference in 10-item center for epidemiological studies depression scale (CESD-10) scores in males from CLSA baseline to CLSA first follow-up, from CLSA first follow-up to COVID-19 baseline survey, and from COVID-19 baseline survey to COVID-19 exist survey for low (-1 SD) vs. high (+1 SD) epigenetic age as determined by each epigenetic age marker from exploratory, uncorrected analyses.

mechanisms may underlie why some individuals do not exhibit accelerated epigenetic aging despite facing significant adversity. For example, in a recent meta-analysis of studies examining factors associated with epigenetic aging, posttraumatic stress disorder was found to be associated with deceleration of epigenetic age, as measured by the Horvath clock, but not with other clocks (e.g., Hannum clock) [22]. Furthermore, epigenetic age deceleration assessed with the Horvath clock was also found in schizophrenia, while the PhenoAge and GrimAge clocks were positively associated with advanced epigenetic age [22]. Both posttraumatic stress disorder and schizophrenia are commonly treated through prescription medications, which could contribute to the divergent findings between epigenetic clocks [51]. Hence, in the present study, unexplored factors such as medication use, pre-existing mental health illness (diagnosed or that may have gone undiagnosed), and other cohort-specific factors at the time of epigenetic age measurement may be playing critical roles in the relationship between low epigenetic age and future increases in depressive symptoms in response to the COVID-19 pandemic.

Prior work has shown that lower income is strongly linked to higher rates of depression [52], which were exacerbated during the pandemic [53]. Financial strain can amplify daily stress, limit access to mental healthcare, and augment social and emotional challenges, which all contribute to greater depressive burden. Raina et al., found that during the initial COVID-19 lockdown and subsequent reopening, lower income was associated with greater increases in the odds of experiencing depressive symptoms [4]. Although income was included as a covariate in our analyses, we did not explore a potential interaction between income and epigenetic age. Future work with larger sample sizes should address this to help determine whether epigenetic age interacts with socioeconomic status to predict depressive response to major stressors. Furthermore, future investigations using epigenetic clocks and outcome measures that are likely to be influenced by anxiety, stress, and/or other mental health diagnoses would benefit from including interactive effects with income and biological sex where possible.

While the results of the present analysis reveal a unique pattern between epigenetic age, depressive symptoms during the early part of the COVID-19 pandemic, and female sex, they should be interpreted with caution, as the study has several important limitations. Epigenetic age was only measured once at baseline, 5 to 8 years before the COVID-19 pandemic. The long time interval between epigenetic age measurement and the onset of the pandemic could reduce the predictive power of epigenetic clock measures, as other environmental and lifestyle exposures experienced during this period could

theoretically have had a greater impact on depressive trajectories in some individuals than the COVID-19 pandemic restrictions themselves. We also do not have access to information regarding depressive symptomology or specific exposures prior to the measurement of the epigenetic clocks in these individuals. It would be of interest to see whether the ability of epigenetic age to predict changes in depressive symptoms would differ if the measurement had occurred at the onset of the pandemic. Future work should measure epigenetic age closer to major stressor exposure. As epigenetic age was only measured once, we were also unable to examine whether changes in epigenetic age over time were associated with changes in depressive symptoms. Additionally, the type of observational data we had access to does not allow us to address and exclude reverse causality, in which the outcome variable influences the exposure rather than the other way around. To further understand the interaction between changes in CESD-10 scores and epigenetic age, our analyses extracted simple slopes for individuals with low epigenetic age, defined as 1 SD below the mean, and those with high epigenetic age, defined as 1 SD above the mean. As the low and high epigenetic groups are the extremes of the range and have no direct clinical relevance, our results are limited in their generalizability. Another limitation of using epigenetic clocks is that each clock has a degree of measurement error, typically ranging from approximately three to five years [52, 54, 55]. This measurement error likely arises from technical variability (e.g., differences in sample handling or array platform) and biological variation (e.g., inter-individual and inter-tissue variation in DNA methylation patterns arising from multiple sources) [56]. Nevertheless, this measurement error likely would have introduced a non-differential measurement bias, where the small differences did not introduce a systematic bias favoring one group (e.g., low vs. high epigenetic age) over another [57]. Thus, this likely would have had minimal influence on the predictive accuracy of the utilized clocks. Finally, epigenetic age was only measured in a subset of participants of the CLSA, and of these 1445 participants, 879 consented to participate in the COVID-19 Questionnaire Survey study. We further excluded 216 participants who self-reported diagnoses of dementia, anxiety, depression or mood disorder, reducing our sample size to 663 from 879, which does reduce the statistical power of our analyses. To balance this reduced statistical power, excluding these participants with mood or neurodegenerative disorders may have also theoretically reduced bias in our findings, as some studies suggest that those with existing mental health conditions were at greater risk for depression and anxiety during the pandemic [58–60]. Thus, future replication in a larger sample with more complete longitudinal data is required, which will allow for more sophisticated statistical

modelling to examine both potential linear and nonlinear relationships.

## CONCLUSION

In summary, this study provides novel insights into the relationship between epigenetic age based on first-generation epigenetic clocks and depressive symptoms in response to the COVID-19 pandemic, particularly highlighting the potential sex-specific nature of these associations. The main findings were that younger epigenetic age (1 standard deviation below the mean), rather than older epigenetic aging, predicted increases in depressive symptoms during the early stages of the pandemic. Our exploratory analyses suggest this was only seen in females. These results underscore the importance of considering biological sex and its interaction with epigenetic markers in mental health research. Despite the study's limitations, which include a single time-point measurement of epigenetic age 5-8 years before the COVID-19 pandemic and a relatively small sample size, both of which influence the interpretation of our findings, these results provide a foundation on which epigenetic markers can be used to identify individuals most vulnerable to the negative effects of major stressor exposures on mental health. We have proposed several hypotheses centred around the concepts of social epigenetics and the social exposome that could help explain our findings. However, these remain strictly hypothetical and require further study. Epigenetic clocks are promising biomarkers for inclusion in risk prediction for many different negative health outcomes and could also be utilized as a screening tool to determine the effectiveness of health-promoting interventions [61]. Specifically, within the context of mental health protection and promotion, epigenetic age based on first- and second-generation clocks, which allow for a more nuanced analysis, could be effectively deployed as a screen for at-risk groups, such as females with high occupational and caregiving burdens. Providing a better explanation for these associations will be crucial in informing public health strategies and developing targeted mental health interventions.

## MATERIALS AND METHODS

### Study design and participants

The CLSA is a longitudinal, national study of community-dwelling middle- and older-aged adults between the ages of 45-85 at baseline (2012-2015). Detailed study design and methods of the CLSA study have been described previously [62]. Very briefly, participants were recruited from across the 10 provinces through the Statistics Canada's Canadian Community

Health Survey, provincial health insurance registries, and random digit dialing. Exclusion criteria for recruitment in the CLSA were: 1) resident of the three territories of Canada; 2) unable to participate in English or French; 3) unable to provide their own data at baseline; 5) living on federal First Nations reserves or other First Nations settlements in the provinces; 4) full-time members of the Canadian Armed Forces; or 5) living in a long-term care institution [62, 63]. Of the 51,338 participants, a subset of 30,097 participants was part of the Comprehensive cohort and completed more detailed physical assessments and provided biospecimens at baseline (2012-2015). From the Comprehensive cohort, 1478 participants were randomly selected for DNA methylation analysis of blood samples provided at study baseline. The selected participants matched the distribution of the Comprehensive cohort in terms of province, age, and sex. Of the 1478 participants, the DNA methylation data from 1445 participants passed established quality control measurements. Of the 30,097 participants of the Comprehensive cohort, 27,765 provided data at first follow-up (2015-2018).

In response to the onset of the COVID-19 pandemic, the CLSA launched the COVID-19 Questionnaire Survey on April 15, 2020, to investigate the epidemiology of COVID-19 including its impact on the physical and mental health of older adults. Of the 51,338 participants recruited into the CLSA, 42,700 were viable at the time of the CLSA COVID-19 Questionnaire Survey and invited to participate. An additional 166 participants were found to be deceased, and 23 participants required a proxy to participate, thus they were excluded from participating. Therefore, 42,511 participants were eligible to participate in the CLSA COVID-19 Questionnaire Survey, of whom 28,559 completed the COVID-19 Baseline survey (April 15 – May 30, 2020), and 24,114 completed the COVID-19 Exit survey (September 29 - December 29, 2020). These data collected included information on COVID-19 symptoms and status, risk factors, healthcare use, health behaviours, and psychosocial and economic consequences of the pandemic. Of the CLSA participants who completed both the COVID-19 Baseline and Exit surveys, 18,533 were part of the Comprehensive cohort. We used data from the COVID-19 Baseline and Exit surveys.

Therefore, the present study includes participants from the Comprehensive Cohort ( $n = 30,097$ ) that provided the required data for our analyses at 1) CLSA baseline (2012-2015), 2) CLSA first follow-up (2015-2018), 3) COVID-19 Baseline survey (April-May 2020), and 4) COVID-19 Exit survey (Sept-Dec 2020), as well as had DNA methylation data from blood at CLSA baseline

(n= 879 out of the 1445 participants). In order to reduce reporting bias, participants who self-reported dementia or memory diagnosis or self-reported having been diagnosed with anxiety, depression, or mood disorder at study baseline (2012-2015) were excluded. Thus, the final sample size was 663 with the STROBE diagram presented in Figure 7.

## Measures

### *DNA methylation and epigenetic age clocks*

Blood samples from CLSA baseline (2012-2015) were assayed using the Illumina Infinium HumanMethylationEPIC (EPIC) BeadChip microarray (Illumina, San Diego, CA, USA), which profiles DNA methylation at >850,000 CpG sites genome-wide. A complete description of the procedures used to generate and prepare the DNA methylation data can be found here: <https://www.clsa-elcv.ca/doc/3491>. Raw DNA methylation data in the form of .IDAT files were downloaded and used to verify sample sex and identity. After using control probes on the EPIC array to confirm that sample sex matched reported sex, and that all samples were genetically distinct, we utilized epigenetic clock data derived by the CLSA team using weight and beta values that were normalized using the Noob normalization approach [64]. Specifically, for the present study we utilized Horvath's DNA Methylation Age clock and Hannum's epigenetic age

clock [54, 55]. Briefly, Horvath's DNA Methylation Age clock (DNAmAge) is a pan-tissue epigenetic clock based on DNA methylation at 353 CpGs, and was one of the first clocks to accurately predict chronological age of samples within 3.6 years, and has since its development been found to associate with biological age and is accelerated in association with many diseases and phenotypes including trisomy 21 [22, 65]. DNAmAge is theoretically unconfounded with cell type proportions [55]. Hannum's epigenetic clock (Hannum Age) is based on DNA methylation on 71 CpGs and was primarily developed for use with whole blood samples and has been associated with several complex diseases similar to Horvath's clock [66]. For the present study, we used CLSA baseline (2012-2015) measurements of DNAmAge and Hannum Age.

### *10-item center for epidemiological studies depression scale*

Depressive symptoms were indexed using the 10-item Center for Epidemiological Studies Depression Scale (CESD-10); a brief questionnaire with evidence of validity and reliability for measuring depressive symptoms [67, 68]. The CESD-10 is scored on a scale ranging from 0 to 30, with each of the 10 items rated on a 0-3 scale based on the frequency of depressive symptoms over the past week. Cut-offs typically include minimal depressive symptoms (0-9/30), mild

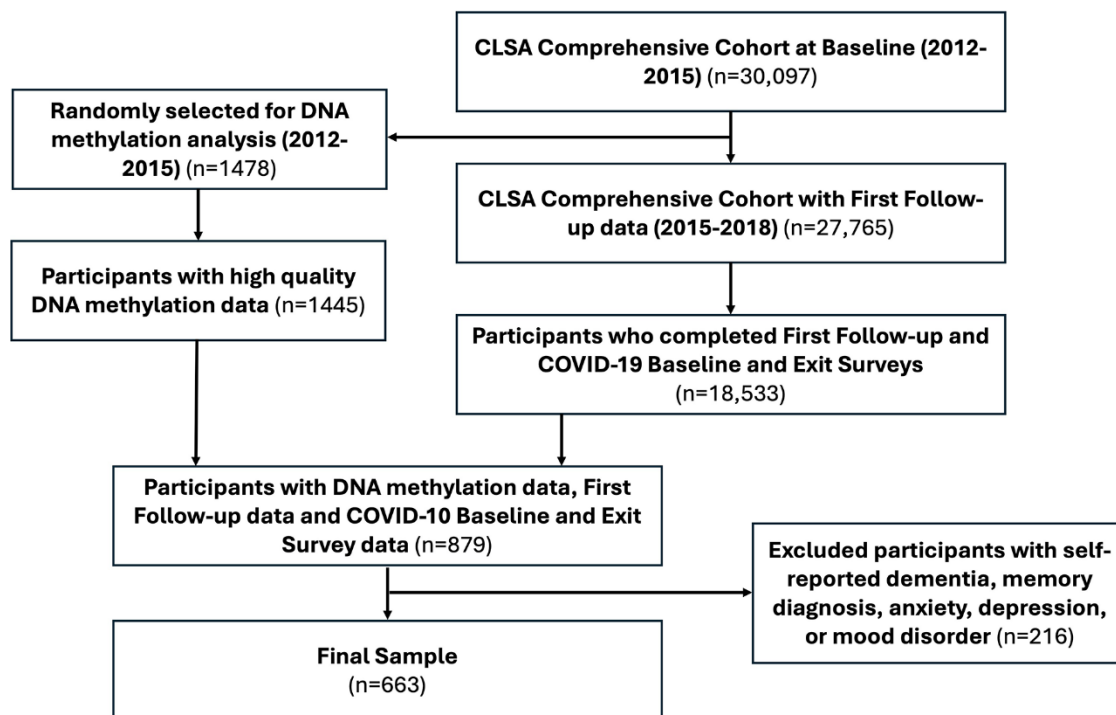

Figure 7. Strengthening the reporting of observational studies in epidemiology (STROBE) diagram.



depressive symptoms (10-15/30), and moderate-to-severe depressive symptoms (16-30/30) [69]. Participants completed the CESD-10 at the data collection site during the CLSA study baseline (2012-2015) and first follow-up (2015-2018). Additionally, participants completed the CESD-10 either by web or telephone during the CLSA COVID-19 Baseline survey (April-May 2020) and during the CLSA COVID-19 Exit survey (Sept-Dec 2020). For the present study, we used the continuous CESD-10 scores out of 30 from all 4 time points: CLSA study baseline, CLSA first follow-up, COVID-19 baseline, and COVID-19 exit.

### **Covariates**

At CLSA study baseline, participants' age, biological sex, educational attainment (i.e., less than high school, high school diploma, some university, university degree or higher), income level, and current living status (i.e., house, apartment, assisted living, or other) were assessed. Additionally, at CLSA baseline participants were queried about whether they had ever been diagnosed with any of the following: heart disease, peripheral vascular disease, memory problems, dementia, multiple sclerosis, epilepsy, migraine headaches, intestinal or stomach ulcers, bowel disorders, bowel incontinence, urinary incontinence, macular degeneration, all-cause cancer, back problems which were not fibromyalgia or arthritis, kidney disease, arthritis in the hand, hip or knee, rheumatoid or other arthritis, any diabetes, high blood pressure, a thyroid condition, angina, stroke or transient ischemic attack, myocardial infarction, asthma, osteoporosis, parkinsonism or Parkinson's disease, or chronic obstructive pulmonary disorder. The number of chronic conditions that a participant identified having been diagnosed with was then computed. In addition, body mass index (BMI: kg/m<sup>2</sup>) was measured using a calibrated scale and stadiometer. Participants were also queried at CLSA baseline for information on their smoking status (i.e., daily, occasional, former, or never-smoker), alcohol intake (regular, occasional, or non-drinker), and physical activity level as measured by the Physical Activity Scale for the Elderly (PASE) [70].

### **Statistical analysis**

All analyses were conducted in R version 4.0.3. Our primary analysis used the *lmer* package (version 1.1-25) and simple slopes analyses with the *Effects* package (version 4.2-2). Graphs and figures were plotted using the *ggplot2* package (version 3.3.5). We conducted all sensitivity analyses of epigenetic data using the packages *BiocManager* (version 1.30.16), *minfi* (version 1.36.0), *IlluminaHumanMethylationEPICmanifest* (version 0.3.0), *IlluminaHumanMethylationEPICanno*.

*ilm10b4.hg19* (version 0.6.0), and *remotes* (version 2.4.1). Our complete statistical analysis and output can be found online (<https://github.com/ryanfalck/CLSA-COVID-19-Epigenetics>). We calculated means, standard deviations (SD), and proportions for all variables of interest at baseline.

We first examined changes in CESD-10 from CLSA baseline to COVID-19 Exit survey (i.e., four time points) based on epigenetic age using mixed linear models with restricted maximum likelihood estimation, wherein we included random intercepts and slopes. Time was also included as a categorical fixed effect. Separate models were conducted for each marker of epigenetic age (i.e., DNAmAge and Hannum Age). Each model controlled for biological sex, BMI, income level, educational attainment, living status, smoking status, alcohol intake, chronic conditions, and physical activity level. Significant time by epigenetic age interactions were then illustrated using simple slopes analyses in which the relationship of epigenetic age with CESD-10 score over time was estimated separately for low epigenetic age (i.e., 1 SD below the mean) and high epigenetic age (i.e., 1 SD above the mean) based on DNAmAge and Hannum Age separately. All estimates were calculated using the full model and included all covariates.

We then contrasted estimated changes in CESD-10 score from 1) CLSA baseline to CLSA first follow-up, 2) CLSA first follow-up to COVID-19 Baseline survey, and 3) COVID-19 Baseline survey to COVID-19 Exit survey for low versus high epigenetic age. We present contrasts as 95% confidence intervals. To account for multiple comparisons, the Benjamini-Hochberg procedure was applied to control the false discovery rate (FDR).

As an exploratory analysis, we examined whether biological sex moderated the relationship between epigenetic age and CESD-10 score over time. We conducted similar models while also including biological sex as an interaction term. We decomposed time by epigenetic age by sex effects using simple slopes analyses for low (-1 SD) and high (+1 SD) epigenetic age for males and females at each time point and contrasted estimated changes in CESD-10 score at each time point. As these were exploratory analyses, we did not control for multiple comparisons [71, 72].

### **Sensitivity analyses**

Sensitivity analyses were performed as quality control assessments of the EPIC data. Participant sex was assessed and confirmed to match annotated phenotypic data using fluorescence intensity values from microarray probes targeting the X and Y chromosomes, according to the method presented in the *ewastools*



package [73]. Sample identity was assessed using the 59 explicit SNP genotyping probes included on the EPIC array to index contamination and sample mix-ups, this was also completed with *ewastools* functions [73]. EPIC array data indicated that there were no samples with contamination. We also determined that no samples had incorrect sex annotation. These results can be found on github <https://github.com/ryanfalck/CLSA-COVID-19-Epigenetics>).

## AUTHOR CONTRIBUTIONS

CKB and TLA conceptualized the study and designed it. AMI and RSF conducted data analyses. CKB drafted the manuscript with the help of JSB who created the figures. All authors contributed to the interpretation of the data, provided revisions of the manuscript, and approved the final version to be published.

## ACKNOWLEDGMENTS

The CLSA is led by Drs. Parminder Raina, Christina Wolfson, and Susan Kirkland. This manuscript is submitted on behalf of other CLSA team members, including: Tarek Amer<sup>1</sup>, Laura Anderson<sup>2</sup>, Cara Brown<sup>3</sup>, Benoît Cossette<sup>4</sup>, Andrew Costa<sup>2</sup>, Zhiwei Gao<sup>5</sup>, David Hogan<sup>6</sup>, Mélanie Levasseur<sup>4</sup>, Jacqueline McMillan<sup>7</sup>, Theone Paterson<sup>8</sup>, Theresa Pauly<sup>9</sup>, Dallas Seitz<sup>10</sup>, Phil St. John<sup>11,12</sup>, Arne Stinchcombe<sup>13</sup>, Vanessa Taler<sup>13</sup>, Olga Theou<sup>14</sup>, Lindsay Wallace<sup>15</sup>, Andrew Wister<sup>9</sup>. CKB is a Tier 2 Canada Research Chair in Neuroscience, Brain Health and Exercise. TLA is a Tier 1 Canada Research Chair in Healthy Aging. RSF is a Canadian Institutes for Health Research Postdoctoral Fellow and Michael Smith Health Research BC Postdoctoral Fellow. LEG is supported by the McLaughlin Foundation Professorship in Population and Public Health. PR holds the Raymond and Margaret Labarge Chair in Research and Knowledge Application for Optimal Aging. The authors gratefully acknowledge the time and commitment of the CLSA participants, without whom this research would not be possible.

### CLSA Team Affiliations:

<sup>1</sup> Department of Psychology, Simon Fraser University, Burnaby, BC, Canada

<sup>2</sup> Department of Health Research Methods, Evidence, and Impact, McMaster University, Hamilton, ON, Canada

<sup>3</sup> Department of Community Health Sciences, University of Manitoba, Winnipeg, MB, Canada

<sup>4</sup> Department of Community Health Sciences, University of Sherbrooke, Sherbrooke, QC, Canada

<sup>5</sup> Division of Population Health and Applied Health Sciences, Memorial University, St. John's, NL, Canada

<sup>6</sup> Department of Medicines, Cumming School of Medicine, University of Calgary, Calgary, AB, Canada

<sup>7</sup> Division of Geriatric Medicine, Department of Medicine, Cumming School of Medicine, University of Calgary, Calgary, AB, Canada

<sup>8</sup> Department of Psychology, University of Victoria, Victoria, BC, Canada

<sup>9</sup> Department of Gerontology, Simon Fraser University, Vancouver, BC, Canada

<sup>10</sup> Department of Psychiatry and Community Health Sciences, Cumming School of Medicine, University of Calgary, Calgary, AB, Canada

<sup>11</sup> Department of Community Medicine, University of Manitoba, Winnipeg, MB, Canada

<sup>12</sup> Department of Geriatric Medicine, University of Manitoba, Winnipeg, MB, Canada

<sup>13</sup> School of Psychology, University of Ottawa, Ottawa, ON, Canada

<sup>14</sup> School of Physiotherapy, Dalhousie University, Halifax, NS, Canada

<sup>15</sup> Department of Community Health and Epidemiology, Dalhousie University, Halifax, NS, Canada

## CONFLICTS OF INTEREST

The authors declare no conflicts of interest.

## ETHICAL STATEMENT AND CONSENT

All participants provided written informed consent. The studies were approved by the Hamilton Integrated Research Ethics Board, as well as by Institutions associated with each CLSA data collection site across Canada, protocol number is H10-02143.

## FUNDING

Funding for the support of the CLSA COVID-19 Questionnaire based study is provided by Juravinski Research Institute, Faculty of Health Sciences, McMaster University, Provost Fund from McMaster University, McMaster Institute for Research on Aging, Public Health Agency of Canada and Government of Nova Scotia. Funding for the Canadian Longitudinal Study on Aging (CLSA) is provided by the Government of Canada through the Canadian Institutes of Health Research (CIHR) under grant reference: LSA 94473 and the Canada Foundation for Innovation, as well as the following provinces, Newfoundland, Nova Scotia, Quebec, Ontario, Manitoba, Alberta, and British Columbia. This research was conducted using the Baseline Comprehensive Dataset version 5.1, Follow-up 1 Comprehensive Dataset version 3.0, Epigenetics version 1.1, and COVID-19 questionnaire data under Application ID No. 21CON001. The CLSA is led by Drs. Parminder Raina, Christina Wolfson and Susan Kirkland. Parminder Raina holds the Raymond and Margaret Labarge Chair in Optimal Aging and Knowledge

## REFERENCES

1. Xiong J, Lipsitz O, Nasri F, Lui LM, Gill H, Phan L, Chen-Li D, Iacobucci M, Ho R, Majeed A, McIntyre RS. Impact of COVID-19 pandemic on mental health in the general population: A systematic review. *J Affect Disord.* 2020; 277:55–64.  
<https://doi.org/10.1016/j.jad.2020.08.001>  
PMID:[32799105](https://pubmed.ncbi.nlm.nih.gov/32799105/)
2. Lotzin A, Krause L, Acquarini E, Ajdukovic D, Ardino V, Arnberg F, Böttche M, Bragesjö M, Dragan M, Figueiredo-Braga M, Gelezelyte O, Grajewski P, Anastassiou-Hadjicharalambous X, et al. Risk and protective factors, stressors, and symptoms of adjustment disorder during the COVID-19 pandemic - First results of the ESTSS COVID-19 pan-European ADJUST study. *Eur J Psychotraumatol.* 2021; 12:1964197.  
<https://doi.org/10.1080/20008198.2021.1964197>  
PMID:[34992755](https://pubmed.ncbi.nlm.nih.gov/34992755/)
3. Joshi D, Gonzalez A, Griffith L, Duncan L, MacMillan H, Kimber M, Vrkljan B, MacKillop J, Beauchamp M, Kates N, Raina P. The trajectories of depressive symptoms among working adults during the COVID-19 pandemic: a longitudinal analysis of the InHamilton COVID-19 study. *BMC Public Health.* 2021; 21:1895.  
<https://doi.org/10.1186/s12889-021-11900-8>  
PMID:[34666722](https://pubmed.ncbi.nlm.nih.gov/34666722/)
4. Raina P, Wolfson C, Griffith L, Kirkland S, McMillan J, Basta N, Joshi D, Oz UE, Sohel N, Maimon G, Thompson M, and CLSA team. A longitudinal analysis of the impact of the COVID-19 pandemic on the mental health of middle-aged and older adults from the Canadian Longitudinal Study on Aging. *Nat Aging.* 2021; 1:1137–47.  
<https://doi.org/10.1038/s43587-021-00128-1>  
PMID:[37117519](https://pubmed.ncbi.nlm.nih.gov/37117519/)
5. Meyer C, El-Haj-Mohamad R, Stammel N, Lotzin A, Schäfer I, Knaevelsrud C, Böttche M. Associations of Depressive Symptoms, COVID-19-Related Stressors, and Coping Strategies. A Comparison Between Cities and Towns in Germany. *Front Psychiatry.* 2022; 12:791312.  
<https://doi.org/10.3389/fpsy.2021.791312>  
PMID:[35153860](https://pubmed.ncbi.nlm.nih.gov/35153860/)
6. Batterham PJ, Caele AL, McCallum SM, Morse AR, Banfield M, Farrer LM, Gulliver A, Cherbuin N, Rodney Harris RM, Shou Y, Dawel A. Trajectories of depression and anxiety symptoms during the COVID-19 pandemic in a representative Australian adult cohort. *Med J Aust.* 2021; 214:462–8.  
<https://doi.org/10.5694/mja2.51043> PMID:[33899939](https://pubmed.ncbi.nlm.nih.gov/33899939/)
7. Shanahan L, Steinhoff A, Bechtiger L, Murray AL, Nivette A, Hepp U, Ribeaud D, Eisner M. Emotional distress in young adults during the COVID-19 pandemic: evidence of risk and resilience from a longitudinal cohort study. *Psychol Med.* 2022; 52:824–33.  
<https://doi.org/10.1017/S003329172000241X>  
PMID:[32571438](https://pubmed.ncbi.nlm.nih.gov/32571438/)
8. Pierce M, Hope H, Ford T, Hatch S, Hotopf M, John A, Kontopantelis E, Webb R, Wessely S, McManus S, Abel KM. Mental health before and during the COVID-19 pandemic: a longitudinal probability sample survey of the UK population. *Lancet Psychiatry.* 2020; 7:883–92.  
[https://doi.org/10.1016/S2215-0366\(20\)30308-4](https://doi.org/10.1016/S2215-0366(20)30308-4)  
PMID:[32707037](https://pubmed.ncbi.nlm.nih.gov/32707037/)
9. Kessler RC, McGonagle KA, Swartz M, Blazer DG, Nelson CB. Sex and depression in the National Comorbidity Survey. I: Lifetime prevalence, chronicity and recurrence. *J Affect Disord.* 1993; 29:85–96.  
[https://doi.org/10.1016/0165-0327\(93\)90026-g](https://doi.org/10.1016/0165-0327(93)90026-g)  
PMID:[8300981](https://pubmed.ncbi.nlm.nih.gov/8300981/)
10. Kornstein SG, Schatzberg AF, Yonkers KA, Thase ME, Keitner GI, Ryan CE, Schlager D. Gender differences in presentation of chronic major depression. *Psychopharmacol Bull.* 1995; 31:711–8.  
PMID:[8851644](https://pubmed.ncbi.nlm.nih.gov/8851644/)
11. Mazza C, Ricci E, Biondi S, Colasanti M, Ferracuti S, Napoli C, Roma P. A Nationwide Survey of Psychological Distress among Italian People during the COVID-19 Pandemic: Immediate Psychological Responses and Associated Factors. *Int J Environ Res Public Health.* 2020; 17:3165.  
<https://doi.org/10.3390/ijerph17093165>  
PMID:[32370116](https://pubmed.ncbi.nlm.nih.gov/32370116/)
12. Hou F, Bi F, Jiao R, Luo D, Song K. Gender differences of depression and anxiety among social media users during the COVID-19 outbreak in China: a cross-sectional study. *BMC Public Health.* 2020; 20:1648.  
<https://doi.org/10.1186/s12889-020-09738-7>  
PMID:[33148202](https://pubmed.ncbi.nlm.nih.gov/33148202/)
13. García-Fernández L, Romero-Ferreiro V, Padilla S, David López-Roldán P, Monzó-García M, Rodríguez-Jimenez R. Gender differences in emotional response to the COVID-19 outbreak in Spain. *Brain Behav.* 2021; 11:e01934.  
<https://doi.org/10.1002/brb3.1934>  
PMID:[33305891](https://pubmed.ncbi.nlm.nih.gov/33305891/)
14. Proto E, Quintana-Domeque C. COVID-19 and mental health deterioration by ethnicity and gender in the UK. *PLoS One.* 2021; 16:e0244419.

<https://doi.org/10.1371/journal.pone.0244419>  
PMID:33406085

15. Eid RS, Gobinath AR, Galea LA. Sex differences in depression: Insights from clinical and preclinical studies. *Prog Neurobiol*. 2019; 176:86–102.  
<https://doi.org/10.1016/j.pneurobio.2019.01.006>  
PMID:30721749
16. Starnawska A, Tan Q, Soerensen M, McGue M, Mors O, Børghlum AD, Christensen K, Nyegaard M, Christiansen L. Epigenome-wide association study of depression symptomatology in elderly monozygotic twins. *Transl Psychiatry*. 2019; 9:214.  
<https://doi.org/10.1038/s41398-019-0548-9>  
PMID:31477683
17. Story Jovanova O, Nedeljkovic I, Spieler D, Walker RM, Liu C, Luciano M, Bressler J, Brody J, Drake AJ, Evans KL, Gondalia R, Kunze S, Kuhnel B, et al. DNA Methylation Signatures of Depressive Symptoms in Middle-aged and Elderly Persons: Meta-analysis of Multiethnic Epigenome-wide Studies. *JAMA Psychiatry*. 2018; 75:949–59.  
<https://doi.org/10.1001/jamapsychiatry.2018.1725>  
PMID:29998287
18. Hodes GE, Walker DM, Labonté B, Nestler EJ, Russo SJ. Understanding the epigenetic basis of sex differences in depression. *J Neurosci Res*. 2017; 95:692–702.  
<https://doi.org/10.1002/jnr.23876>  
PMID:27870456
19. Zeng Y, Amador C, Xia C, Marioni R, Sproul D, Walker RM, Morris SW, Bretherick A, Canela-Xandri O, Boutin TS, Clark DW, Campbell A, Rawlik K, et al. Parent of origin genetic effects on methylation in humans are common and influence complex trait variation. *Nat Commun*. 2019; 10:1383.  
<https://doi.org/10.1038/s41467-019-09301-y>  
PMID:30918249
20. Izadi M, Sadri N, Abdi A, Serajian S, Jalalei D, Tahmasebi S. Epigenetic biomarkers in aging and longevity: Current and future application. *Life Sci*. 2024; 351:122842.  
<https://doi.org/10.1016/j.lfs.2024.122842>  
PMID:38879158
21. Meier M, Kantelhardt S, Gurri L, Stadler C, Schmid M, Clemens V, O'Donovan A, Boonmann C, Bürgin D, Unternaehrer E. Childhood trauma is linked to epigenetic age deceleration in young adults with previous youth residential care placements. *Eur J Psychotraumatol*. 2024; 15:2379144.  
<https://doi.org/10.1080/20008066.2024.2379144>  
PMID:39051592
22. Oblak L, van der Zaag J, Higgins-Chen AT, Levine ME, Boks MP. A systematic review of biological, social and environmental factors associated with epigenetic clock acceleration. *Ageing Res Rev*. 2021; 69:101348.  
<https://doi.org/10.1016/j.arr.2021.101348>  
PMID:33930583
23. Smeeth D, Ecker S, Chervova O, McEwen F, Karam E, Beck S, Pluess M. War Exposure and DNA Methylation in Syrian Refugee Children and Adolescents. *JAMA Psychiatry*. 2025; 82:191–200.  
<https://doi.org/10.1001/jamapsychiatry.2024.3714>  
PMID:39565630
24. Hillary RF, Stevenson AJ, McCartney DL, Campbell A, Walker RM, Howard DM, Ritchie CW, Horvath S, Hayward C, McIntosh AM, Porteous DJ, Deary IJ, Evans KL, Marioni RE. Epigenetic measures of ageing predict the prevalence and incidence of leading causes of death and disease burden. *Clin Epigenetics*. 2020; 12:115.  
<https://doi.org/10.1186/s13148-020-00905-6>  
PMID:32736664
25. Chervova O, Panteleeva K, Chernysheva E, Widayati TA, Baronik ŽF, Hrbková N, Schneider JL, Bobak M, Beck S, Voloshin V. Breaking new ground on human health and well-being with epigenetic clocks: A systematic review and meta-analysis of epigenetic age acceleration associations. *Ageing Res Rev*. 2024; 102:102552.  
<https://doi.org/10.1016/j.arr.2024.102552>  
PMID:39423872
26. Han LK, Aghajani M, Clark SL, Chan RF, Hattab MW, Shabalin AA, Zhao M, Kumar G, Xie LY, Jansen R, Milaneschi Y, Dean B, Aberg KA, et al. Epigenetic Aging in Major Depressive Disorder. *Am J Psychiatry*. 2018; 175:774–82.  
<https://doi.org/10.1176/appi.ajp.2018.17060595>  
PMID:29656664
27. Harvanek ZM, Fogelman N, Xu K, Sinha R. Psychological and biological resilience modulates the effects of stress on epigenetic aging. *Transl Psychiatry*. 2021; 11:601.  
<https://doi.org/10.1038/s41398-021-01735-7>  
PMID:34839356
28. Shaikh M, Doshi G. Epigenetic aging in major depressive disorder: Clocks, mechanisms and therapeutic perspectives. *Eur J Pharmacol*. 2024; 978:176757.  
<https://doi.org/10.1016/j.ejphar.2024.176757>  
PMID:38897440
29. Zannas AS, Arloth J, Carrillo-Roa T, Iurato S, Röh S, Ressler KJ, Nemeroff CB, Smith AK, Bradley B, Heim C, Menke A, Lange JF, Brückl T, et al. Lifetime stress accelerates epigenetic aging in an urban, African American cohort: relevance of glucocorticoid signaling. *Genome Biol*. 2015; 16:266.  
<https://doi.org/10.1186/s13059-015-0828-5>  
PMID:26673150

30. Barbu MC, Shen X, Walker RM, Howard DM, Evans KL, Whalley HC, Porteous DJ, Morris SW, Deary IJ, Zeng Y, Marioni RE, Clarke TK, McIntosh AM. Epigenetic prediction of major depressive disorder. *Mol Psychiatry*. 2021; 26:5112–23.  
<https://doi.org/10.1038/s41380-020-0808-3>  
PMID:[32523041](https://pubmed.ncbi.nlm.nih.gov/32523041/)
31. Webb LM, Chen CY. The COVID-19 pandemic's impact on older adults' mental health: Contributing factors, coping strategies, and opportunities for improvement. *Int J Geriatr Psychiatry*. 2022; 37:10.1002.  
<https://doi.org/10.1002/gps.5647> PMID:[34729802](https://pubmed.ncbi.nlm.nih.gov/34729802/)
32. Mueller AL, McNamara MS, Sinclair DA. Why does COVID-19 disproportionately affect older people? *Aging (Albany NY)*. 2020; 12:9959–81.  
<https://doi.org/10.18632/aging.103344>  
PMID:[32470948](https://pubmed.ncbi.nlm.nih.gov/32470948/)
33. Lebrasseur A, Fortin-Bédard N, Lettre J, Raymond E, Bussi  res EL, Lapierre N, Faieta J, Vincent C, Duchesne L, Ouellet MC, Gagnon E, Tourigny A, Lamontagne M  , Routhier F. Impact of the COVID-19 Pandemic on Older Adults: Rapid Review. *JMIR Aging*. 2021; 4:e26474.  
<https://doi.org/10.2196/26474> PMID:[33720839](https://pubmed.ncbi.nlm.nih.gov/33720839/)
34. Horvath S, Gurven M, Levine ME, Trumble BC, Kaplan H, Allayee H, Ritz BR, Chen B, Lu AT, Rickabaugh TM, Jamieson BD, Sun D, Li S, et al. An epigenetic clock analysis of race/ethnicity, sex, and coronary heart disease. *Genome Biol*. 2016; 17:171.  
<https://doi.org/10.1186/s13059-016-1030-0>  
PMID:[27511193](https://pubmed.ncbi.nlm.nih.gov/27511193/)
35. Inkster AM, Duarte-Guterman P, Albert AY, Barha CK, Galea LA, Robinson WP, and Alzheimer's Disease Neuroimaging Initiative. Are sex differences in cognitive impairment reflected in epigenetic age acceleration metrics? *Neurobiol Aging*. 2022; 109:192–4.  
<https://doi.org/10.1016/j.neurobiolaging.2021.09.022>  
PMID:[34775209](https://pubmed.ncbi.nlm.nih.gov/34775209/)
36. Barry LC, Allore HG, Guo Z, Bruce ML, Gill TM. Higher burden of depression among older women: the effect of onset, persistence, and mortality over time. *Arch Gen Psychiatry*. 2008; 65:172–8.  
<https://doi.org/10.1001/archgenpsychiatry.2007.17>  
PMID:[18250255](https://pubmed.ncbi.nlm.nih.gov/18250255/)
37. Bale TL, Epperson CN. Sex differences and stress across the lifespan. *Nat Neurosci*. 2015; 18:1413–20.  
<https://doi.org/10.1038/nn.4112> PMID:[26404716](https://pubmed.ncbi.nlm.nih.gov/26404716/)
38. Klopach ET, Crimmins EM, Cole SW, Seeman TE, Carroll JE. Accelerated epigenetic aging mediates link between adverse childhood experiences and depressive symptoms in older adults: Results from the Health and Retirement Study. *SSM Popul Health*. 2022; 17:101071.  
<https://doi.org/10.1016/j.ssmph.2022.101071>  
PMID:[35313610](https://pubmed.ncbi.nlm.nih.gov/35313610/)
39. Lawrence KG, Kresovich JK, O'Brien KM, Hoang TT, Xu Z, Taylor JA, Sandler DP. Association of Neighborhood Deprivation With Epigenetic Aging Using 4 Clock Metrics. *JAMA Netw Open*. 2020; 3:e2024329.  
<https://doi.org/10.1001/jamanetworkopen.2020.24329>  
PMID:[33146735](https://pubmed.ncbi.nlm.nih.gov/33146735/)
40. Schmitz LL, Zhao W, Ratliff SM, Goodwin J, Miao J, Lu Q, Guo X, Taylor KD, Ding J, Liu Y, Levine M, Smith JA. The Socioeconomic Gradient in Epigenetic Ageing Clocks: Evidence from the Multi-Ethnic Study of Atherosclerosis and the Health and Retirement Study. *Epigenetics*. 2022; 17:589–611.  
<https://doi.org/10.1080/15592294.2021.1939479>  
PMID:[34227900](https://pubmed.ncbi.nlm.nih.gov/34227900/)
41. Nielsen L, Marsland AL, Hamlat EJ, Epel ES. New Directions in Geroscience: Integrating Social and Behavioral Drivers of Biological Aging. *Psychosom Med*. 2024; 86:360–5.  
<https://doi.org/10.1097/PSY.0000000000001320>  
PMID:[38718171](https://pubmed.ncbi.nlm.nih.gov/38718171/)
42. Hillmann AR, Dhingra R, Reed RG. Positive social factors prospectively predict younger epigenetic age: Findings from the Health and Retirement Study. *Psychoneuroendocrinology*. 2023; 148:105988.  
<https://doi.org/10.1016/j.psyneuen.2022.105988>  
PMID:[36446244](https://pubmed.ncbi.nlm.nih.gov/36446244/)
43. Sommerlad A, Marston L, Huntley J, Livingston G, Lewis G, Steptoe A, Fancourt D. Social relationships and depression during the COVID-19 lockdown: longitudinal analysis of the COVID-19 Social Study. *Psychol Med*. 2021. [Epub ahead of print].  
<https://doi.org/10.1017/S0033291721000039>  
PMID:[33436126](https://pubmed.ncbi.nlm.nih.gov/33436126/)
44. Ammous F, Peterson MD, Mitchell C, Faul JD. Physical Activity Is Associated With Decreased Epigenetic Aging: Findings From the Health and Retirement Study. *J Cachexia Sarcopenia Muscle*. 2025; 16:e13873.  
<https://doi.org/10.1002/jcsm.13873>  
PMID:[40511567](https://pubmed.ncbi.nlm.nih.gov/40511567/)
45. Spartano NL, Wang R, Yang Q, Chernofsky A, Murabito JM, Vasani RS, Levy D, Beiser AS, Seshadri S. Association of Accelerometer-Measured Physical Activity and Sedentary Time with Epigenetic Markers of Aging. *Med Sci Sports Exerc*. 2023; 55:264–72.  
<https://doi.org/10.1249/MSS.0000000000003041>  
PMID:[36107108](https://pubmed.ncbi.nlm.nih.gov/36107108/)
46. Zhang J, Yen ST. Physical Activity, Gender Difference, and Depressive Symptoms. *Health Serv Res*. 2015; 50:1550–73.  
<https://doi.org/10.1111/1475-6773.12285>



PMID:[25630931](#)

47. Huang Y, Li L, Gan Y, Wang C, Jiang H, Cao S, Lu Z. Sedentary behaviors and risk of depression: a meta-analysis of prospective studies. *Transl Psychiatry*. 2020; 10:26.  
<https://doi.org/10.1038/s41398-020-0715-z>  
PMID:[32066686](#)
48. Kleidermacher LE, Olfson M. Gender Differences in the Association Between Screen Time and Depression. *AJPM Focus*. 2023; 3:100176.  
<https://doi.org/10.1016/j.focus.2023.100176>  
PMID:[38304022](#)
49. Falck RS, O'Connell ME, Taler V, Raina P, Wolfson C, Griffith LE, Smith EE, Liu-Ambrose T, and Canadian Longitudinal Study on Aging (CLSA) Team. The COVID-19 pandemic's effects on cognition and 24-hour movement behaviours: Findings from the CLSA. *Maturitas*. 2025; 196:108243.  
<https://doi.org/10.1016/j.maturitas.2025.108243>  
PMID:[40088680](#)
50. Cosco TD, Wister A, Best JR, Riadi I, Kervin L, Hopper S, Basta NE, Wolfson C, Kirkland SA, Griffith LE, McMillani JM, Raina P. Worsened Ability to Engage in Social and Physical Activity During the COVID-19 Pandemic and Older Adults' Mental Health: Longitudinal Analysis From the Canadian Longitudinal Study on Aging. *Innov Aging*. 2023; 7:igad086.  
<https://doi.org/10.1093/geroni/igad086>  
PMID:[37771714](#)
51. Higgins-Chen AT, Boks MP, Vinkers CH, Kahn RS, Levine ME. Schizophrenia and Epigenetic Aging Biomarkers: Increased Mortality, Reduced Cancer Risk, and Unique Clozapine Effects. *Biol Psychiatry*. 2020; 88:224–35.  
<https://doi.org/10.1016/j.biopsych.2020.01.025>  
PMID:[32199607](#)
52. Raina PS, Wolfson C, Kirkland SA, Griffith LE, Oremus M, Patterson C, Tuokko H, Penning M, Balion CM, Hogan D, Wister A, Payette H, Shannon H, Brazil K. The Canadian longitudinal study on aging (CLSA). *Can J Aging*. 2009; 28:221–9.  
<https://doi.org/10.1017/S0714980809990055>  
PMID:[19860977](#)
53. COVID-19 Mental Disorders Collaborators. Global prevalence and burden of depressive and anxiety disorders in 204 countries and territories in 2020 due to the COVID-19 pandemic. *Lancet*. 2021; 398:1700–12.  
[https://doi.org/10.1016/S0140-6736\(21\)02143-7](https://doi.org/10.1016/S0140-6736(21)02143-7)  
PMID:[34634250](#)
54. Hannum G, Guinney J, Zhao L, Zhang L, Hughes G, Satta S, Klotzle B, Bibikova M, Fan JB, Gao Y, Deconde R, Chen M, Rajapakse I, et al. Genome-wide methylation profiles reveal quantitative views of human aging rates. *Mol Cell*. 2013; 49:359–67.  
<https://doi.org/10.1016/j.molcel.2012.10.016>  
PMID:[23177740](#)
55. Horvath S. DNA methylation age of human tissues and cell types. *Genome Biol*. 2013; 14:R115.  
<https://doi.org/10.1186/gb-2013-14-10-r115>  
PMID:[24138928](#)
56. Azzi A, Dallmann R, Casserly A, Rehrauer H, Patrignani A, Maier B, Kramer A, Brown SA. Circadian behavior is light-reprogrammed by plastic DNA methylation. *Nat Neurosci*. 2014; 17:377–82.  
<https://doi.org/10.1038/nn.3651>  
PMID:[24531307](#)
57. Fosgate GT. Non-differential measurement error does not always bias diagnostic likelihood ratios towards the null. *Emerg Themes Epidemiol*. 2006; 3:7.  
<https://doi.org/10.1186/1742-7622-3-7>  
PMID:[16846512](#)
58. Chatterjee SS, Barikar C M, Mukherjee A. Impact of COVID-19 pandemic on pre-existing mental health problems. *Asian J Psychiatr*. 2020; 51:102071.  
<https://doi.org/10.1016/j.ajp.2020.102071>  
PMID:[32334407](#)
59. Druss BG. Addressing the COVID-19 Pandemic in Populations With Serious Mental Illness. *JAMA Psychiatry*. 2020; 77:891–2.  
<https://doi.org/10.1001/jamapsychiatry.2020.0894>  
PMID:[32242888](#)
60. Gobbi S, Plomecka MB, Ashraf Z, Radziński P, Neckels R, Lazzeri S, Dedić A, Bakalović A, Hrustić L, Skórko B, Es Haghi S, Almazidou K, Rodríguez-Pino L, et al. Worsening of Preexisting Psychiatric Conditions During the COVID-19 Pandemic. *Front Psychiatry*. 2020; 11:581426.  
<https://doi.org/10.3389/fpsy.2020.581426>  
PMID:[33391049](#)
61. Duan R, Fu Q, Sun Y, Li Q. Epigenetic clock: A promising biomarker and practical tool in aging. *Ageing Res Rev*. 2022; 81:101743.  
<https://doi.org/10.1016/j.arr.2022.101743>  
PMID:[36206857](#)
62. Raina P, Wolfson C, Kirkland S, Griffith LE, Balion C, Cossette B, Dionne I, Hofer S, Hogan D, van den Heuvel ER, Liu-Ambrose T, Menec V, Mugford G, et al. Cohort Profile: The Canadian Longitudinal Study on Aging (CLSA). *Int J Epidemiol*. 2019; 48:1752–3j.  
<https://doi.org/10.1093/ije/dyz173> PMID:[31633757](#)
63. Kirkland SA, Griffith LE, Menec V, Wister A, Payette H, Wolfson C, Raina PS. Mining a Unique Canadian Resource: The Canadian Longitudinal Study on Aging. *Can J Aging*. 2015; 34:366–77.  
<https://doi.org/10.1017/S071498081500029X>



PMID:[26300192](#)

64. Aryee MJ, Jaffe AE, Corrada-Bravo H, Ladd-Acosta C, Feinberg AP, Hansen KD, Irizarry RA. Minfi: a flexible and comprehensive Bioconductor package for the analysis of Infinium DNA methylation microarrays. *Bioinformatics*. 2014; 30:1363–9.  
<https://doi.org/10.1093/bioinformatics/btu049>  
PMID:[24478339](#)
65. Xu K, Li S, Muskens IS, Elliott N, Myint SS, Pandey P, Hansen HM, Morimoto LM, Kang AY, Ma X, Metayer C, Mueller BA, Roberts I, et al. Accelerated epigenetic aging in newborns with Down syndrome. *Aging Cell*. 2022; 21:e13652.  
<https://doi.org/10.1111/acer.13652> PMID:[35661546](#)
66. Margiotti K, Monaco F, Fabiani M, Mesoraca A, Giorlandino C. Epigenetic Clocks: In Aging-Related and Complex Diseases. *Cytogenet Genome Res*. 2023; 163:247–56.  
<https://doi.org/10.1159/000534561> PMID:[37899027](#)
67. Irwin M, Artin KH, Oxman MN. Screening for depression in the older adult: criterion validity of the 10-item Center for Epidemiological Studies Depression Scale (CES-D). *Arch Intern Med*. 1999; 159:1701–4.  
<https://doi.org/10.1001/archinte.159.15.1701>  
PMID:[10448771](#)
68. Carpenter JS, Andrykowski MA, Wilson J, Hall LA, Rayens MK, Sachs B, Cunningham LL. Psychometrics for two short forms of the Center for Epidemiologic Studies-Depression Scale. *Issues Ment Health Nurs*. 1998; 19:481–94.  
<https://doi.org/10.1080/016128498248917>  
PMID:[9782864](#)
69. Andresen EM, Malmgren JA, Carter WB, Patrick DL. Screening for depression in well older adults: evaluation of a short form of the CES-D (Center for Epidemiologic Studies Depression Scale). *Am J Prev Med*. 1994; 10:77–84.  
PMID:[8037935](#)
70. Washburn RA, Smith KW, Jette AM, Janney CA. The Physical Activity Scale for the Elderly (PASE): development and evaluation. *J Clin Epidemiol*. 1993; 46:153–62.  
[https://doi.org/10.1016/0895-4356\(93\)90053-4](https://doi.org/10.1016/0895-4356(93)90053-4)  
PMID:[8437031](#)
71. Goeman JJ, Solari A. Multiple testing for exploratory research. *Statistical Science*. 2011; p. 584–97.  
<https://doi.org/10.32614/CRAN.package.cherry>
72. Jaeger RG, Halliday TR. On Confirmatory versus Exploratory Research. *Herpetologica*. 1998; 54.
73. Murat K, Grüning B, Poterlowicz PW, Westgate G, Tobin DJ, Poterlowicz K. Ewastools: Infinium Human Methylation BeadChip pipeline for population epigenetics integrated into Galaxy. *Gigascience*. 2020; 9:giaa049.  
<https://doi.org/10.1093/gigascience/giaa049>  
PMID:[32401319](#)
